# Supplementary material
Source: Elsevier journal article supplement (https://www.sciencedirect.com/science/article/pii/S265966362030031X)
Supplement: mmc1 [file S265966362030031X:mmc1.pdf]

## SUPPLEMENTARY MATERIAL

**This interviewer-administered questionnaire to evaluate the clinical approach of primary physicians in the management of chronic cough in Najran City, Saudi Arabia.**

### **FIRST PART: (SOCIODEMOGRAPHIC DATA)**

- **Gender:**
  - Male
  - Female
- **Age:**
  - <30
  - 30-40
  - 40-50
  - >50
- **Nationality:**
  - Saudi
  - Non-Saudi
- **Marital status:**
  - Single
  - Married
  - Divorce
- **Job title:**
  - General Practionair
  - Senior registrar
  - Consultant
- **Medical Specialty:**
  - General medicine
  - Emergency medicine
  - Family medicine
  - General internal medicine
  - General pediatric medicine
- **Qualification degree:**
  - Bachler
  - Diploma
  - Master
  - PhD.
  - Board

- **Work place:**
  - MOH
  - University health services
  - Military health services
  - National Guard health services
  - Interior ministry health services
  - Private health services
- **healthcare facility:**
  - PHC-center
  - Hospital-outpatient clinic
  - Hospital -emergency department
  - Polyclinic
- **Experience duration:**
  - <5years
  - 5-10years
  - 11-20 years
  - >20years

## **SECOND PART: (CLINICAL AUDIT)**

**Based on your clinical experience; answer the following questions:**

- 1) How many patients do you manage per clinic?  
.....
- 2) How many patients with chronic cough do you manage per clinic?  
.....

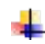

### **THIRD PART (primary physicians' approach to chronic cough)**

| Domain    | #  | Item                                                                                               | Strongly Agree | Agree | Neither Or N/A | Disagree | Strongly Disagree |
|-----------|----|----------------------------------------------------------------------------------------------------|----------------|-------|----------------|----------|-------------------|
| Diagnosis | 1  | I make definitive diagnosis for patient with chronic cough based on history & physical examination |                |       |                |          |                   |
|           | 2  | I make definitive diagnosis for patient with chronic cough based on further tests                  |                |       |                |          |                   |
|           | 3  | I make definitive diagnosis for patient with chronic cough based on response to empiric therapy    |                |       |                |          |                   |
| Etiology  | 4  | I find the etiology of most of chronic cough cases is infection                                    |                |       |                |          |                   |
|           | 5  | I find the etiology of most of chronic cough cases is allergy                                      |                |       |                |          |                   |
|           | 6  | I find the etiology of most of chronic cough cases is inflammation                                 |                |       |                |          |                   |
|           | 7  | I find the etiology of most of chronic cough cases is medications                                  |                |       |                |          |                   |
|           | 8  | I find the etiology of most of chronic cough cases is malignancy                                   |                |       |                |          |                   |
| Treatment | 9  | I do not treat patient with chronic cough unless I make definitive diagnosis                       |                |       |                |          |                   |
|           | 10 | I explain to patient that most of chronic cough are self-limited                                   |                |       |                |          |                   |
|           | 11 | I advise patient with chronic cough about nonpharmacological remedies                              |                |       |                |          |                   |
|           | 12 | If upper airway cough syndrome is suspected, I prescribe a decongestant & an antihistamine         |                |       |                |          |                   |
|           | 13 | If bronchial asthma is suspected, I prescribe an inhaled bronchodilators or corticosteroids        |                |       |                |          |                   |
|           | 14 | If gastroesophageal reflux disease is suspected, I prescribe an antacid agent                      |                |       |                |          |                   |
|           | 15 | If ACE inhibitors using is suspected, I shift to another antihypertensive agent                    |                |       |                |          |                   |
|           | 16 | If an environmental irritant is suspected; I eliminate the patient's exposure to irritants         |                |       |                |          |                   |
|           | 17 | Then after, if chronic cough persists; I think about psychogenic cough                             |                |       |                |          |                   |
|           | 18 | I refer patient with chronic cough to specialized physician                                        |                |       |                |          |                   |
| Consider  | 19 | I approach the child with chronic cough as same as adult approach                                  |                |       |                |          |                   |

|  |    |                                                                                           |  |  |  |  |  |
|--|----|-------------------------------------------------------------------------------------------|--|--|--|--|--|
|  | 20 | I advise parents against administering cough medications to children younger than 4 years |  |  |  |  |  |
|--|----|-------------------------------------------------------------------------------------------|--|--|--|--|--|
