# Supplementary material
Source: Elsevier journal article supplement (https://www.sciencedirect.com/science/article/pii/S265966362030031X)
Supplement: mmc2 [file S265966362030031X:mmc2.pdf]

## Internal Consistency

| N  | Item                                                                                               | R      | Sig.    |
|----|----------------------------------------------------------------------------------------------------|--------|---------|
| 1  | I make definitive diagnosis for patient with chronic cough based on history & physical examination | .432** | p < .01 |
| 2  | I make definitive diagnosis for patient with chronic cough based on further tests                  | .511** | p < .01 |
| 3  | I make definitive diagnosis for patient with chronic cough based on response to empiric therapy    | .462** | p < .01 |
| 4  | I find the etiology of most of chronic cough cases is infection                                    | .504** | p < .01 |
| 5  | I find the etiology of most of chronic cough cases is allergy                                      | .605** | p < .01 |
| 6  | I find the etiology of most of chronic cough cases is inflammation                                 | .406** | p < .01 |
| 7  | I find the etiology of most of chronic cough cases is medications                                  | .378** | p < .01 |
| 8  | I find the etiology of most of chronic cough cases is malignancy                                   | .285** | p < .01 |
| 9  | I do not treat patient with chronic cough unless I make definitive diagnosis                       | .449** | p < .01 |
| 10 | I explain to patient that most of chronic cough are self-limited                                   | .523** | p < .01 |
| 11 | I advise patient with chronic cough about nonpharmacological remedies                              | .516** | p < .01 |
| 12 | If upper airway cough syndrome is suspected, I prescribe a decongestant & an antihistamine         | .551** | p < .01 |
| 13 | If bronchial asthma is suspected, I prescribe an inhaled bronchodilators or corticosteroids        | .481** | p < .01 |
| 14 | If gastroesophageal reflux disease is suspected, I prescribe an antacid agent                      | .434** | p < .01 |
| 15 | If ACE inhibitors using is suspected, I shift to another antihypertensive agent                    | .374** | p < .01 |
| 16 | If an environmental irritant is suspected; I eliminate the patient's exposure to irritants         | .557** | p < .01 |
| 17 | Then after, if chronic cough persists; I think about psychogenic cough                             | .422** | p < .01 |
| 18 | I refer patient with chronic cough to specialized physician                                        | .566** | p < .01 |
| 19 | I approach the child with chronic cough as same as adult approach                                  | .555** | p < .01 |
| 20 | I advise parents against administering cough medications to children younger than 4 years          | .195*  | p < .05 |

Correlation is significant at the 0.01 level (2-tailed) .\*\*

Correlation is significant at the 0.05 level (2-tailed) .\*

Alpha coefficient is (0.789)
